# Supplementary material
Source: PubMed Central journal article supplement (PMC3531239)
Supplement: NIHMS429255-supplement-supplement_1.pdf [file NIHMS429255-supplement-supplement_1.pdf]

## Supplementary Figure Legend

### Supplementary Figure S1.

Schematic of genes involved in carnitine homeostasis and fatty acid catabolism in renal tubular cells. The increase in  $\beta$ -oxidation of fatty acids enhances the supply of acetyl-coenzyme A used for the generation of ATP. *Abbreviations:* acyl-CoA, acyl-coenzyme A; Cact, carnitine-acylcarnitine translocase (*Slc25a20*); Cpt, carnitine-palmitoyltransferase; Crat, carnitine acetyltransferase; Oat3, organic anion transporter 3 (*Slc22a8*); Oct, organic cation transporter; Octn, novel organic cation transporter.

Supplementary Figure S1

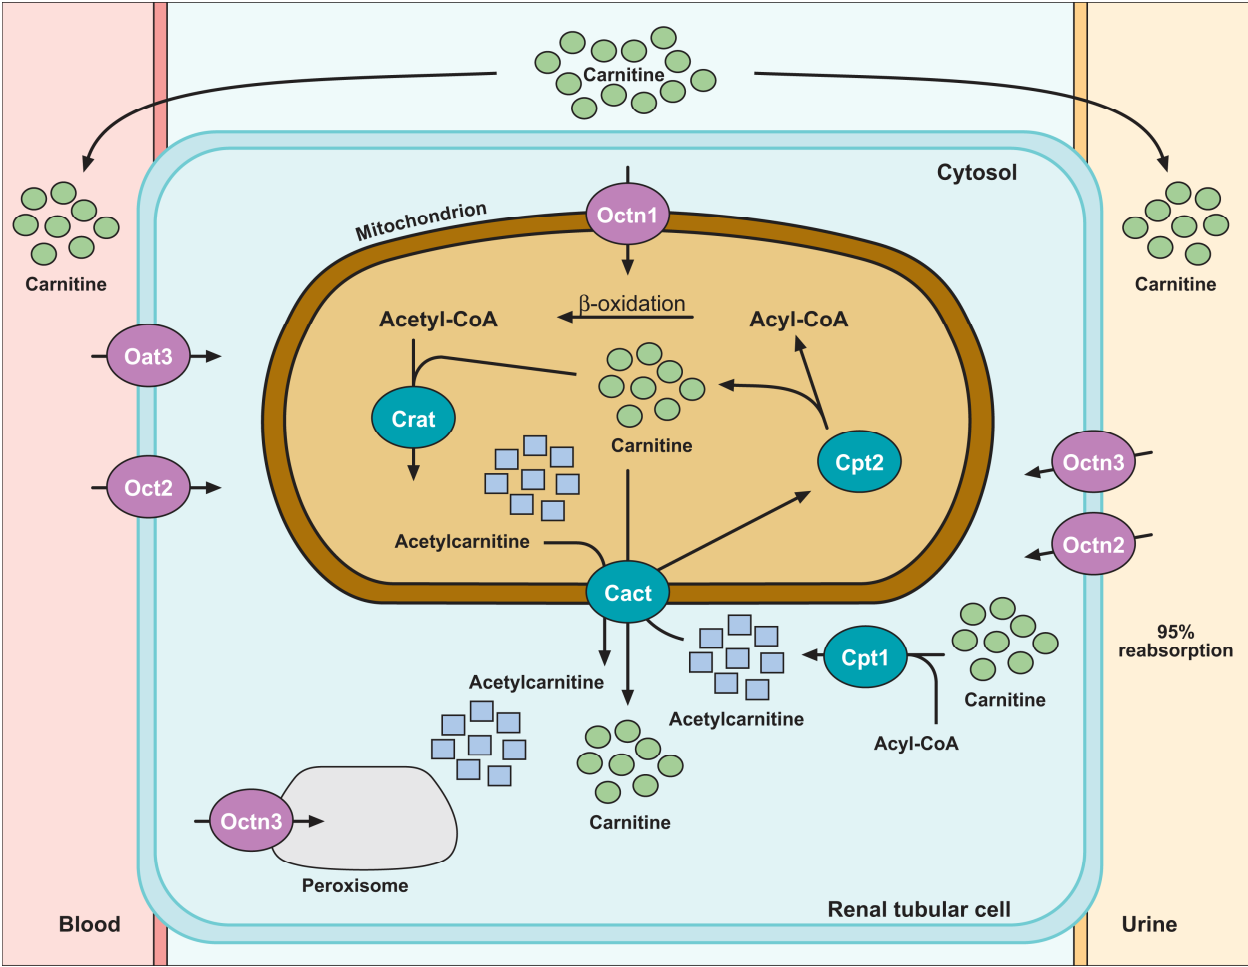

**Supplementary Table S1.**

Gene expression changes in kidney of wildtype mice and Oct1/2(-/-) mice at baseline and 72 h after cisplatin (10 mg/kg).

| Gene                       | Common alias | Wildtype mice                      |         | Oct1/2(-/-) mice                   |         | Untreated          | Treated            |
|----------------------------|--------------|------------------------------------|---------|------------------------------------|---------|--------------------|--------------------|
|                            |              | % difference (treated vs baseline) | P-value | % difference (treated vs baseline) | P-value | P-value (WT vs KO) | P-value (WT vs KO) |
| <b><i>Cyp2e1</i></b>       | CYP2E1       | -281                               | 0.015   | -42                                | 0.019   | 0.39               | 0.043              |
| <b><i>Mapk14</i></b>       | P38 MAPK     | +57                                | 0.13    | +82                                | 0.0040  | 0.88               | 0.41               |
| <b><i>Tnf-α genes</i></b>  |              |                                    |         |                                    |         |                    |                    |
| <b><i>Cxcl2</i></b>        | MIP-2        | +2,740                             | 0.0015  | +1,110                             | 0.00003 | 0.65               | 0.046              |
| <b><i>Cxcl10</i></b>       | IP-10        | +305                               | 0.0006  | +147                               | 0.0014  | 0.60               | 0.018              |
| <b><i>Tnfrsf1α</i></b>     | TNFR2        | +190                               | 0.00004 | +147                               | 0.004   | 0.74               | 0.14               |
| <b><i>Tgfb1</i></b>        | TGF-β        | +333                               | 0.0004  | +82                                | 0.014   | 0.45               | 0.016              |
| <b><i>Ccl2</i></b>         | MCP-1        | +1,897                             | 0.0008  | +407                               | 0.015   | 0.23               | 0.019              |
| <b><i>Ccl5</i></b>         | RANTES       | +416                               | 0.051   | +99                                | 0.25    | 0.90               | 0.018              |
| <b><i>Icam1</i></b>        | ICAM-1       | +662                               | 0.0002  | +279                               | 0.0011  | 0.25               | 0.021              |
| <b><i>Il-1β</i></b>        | IL-1β        | +214                               | 0.070   | +30                                | 0.32    | 0.70               | 0.20               |
| <b><i>Ppar-α genes</i></b> |              |                                    |         |                                    |         |                    |                    |
| <b><i>Ppar-α</i></b>       | PPAR-α       | -20                                | 0.32    | +3                                 | 0.70    | 0.97               | 0.28               |
| <b><i>Acox1</i></b>        | Acyl-CoA     | -66                                | 0.0023  | -8                                 | 0.45    | 0.85               | 0.011              |
| <b><i>Rxr-α</i></b>        | RXR-α        | -49                                | 0.13    | -51                                | 0.029   | 0.73               | 0.51               |
| <b><i>Ppargc1α</i></b>     | PGC-1        | -105                               | 0.0058  | -40                                | 0.12    | 0.34               | 0.016              |

Abbreviations: WT, wildtype mice; KO, Oct1/2(-/-) mice. Data represent the mean percent difference from baseline from 4 animals per group.
